# Supplementary material for: Increase in Work Productivity of Depressed Individuals With Improvement in Depressive Symptom Severity
Source: Atypon-hosted journal article supplement (doi:10.1176/appi.ajp.2012.12020250), 2013-04-05
Supplement: 633_ds001.pdf [file 633_ds001.pdf]

**FIGURE S1. Participant Distribution**

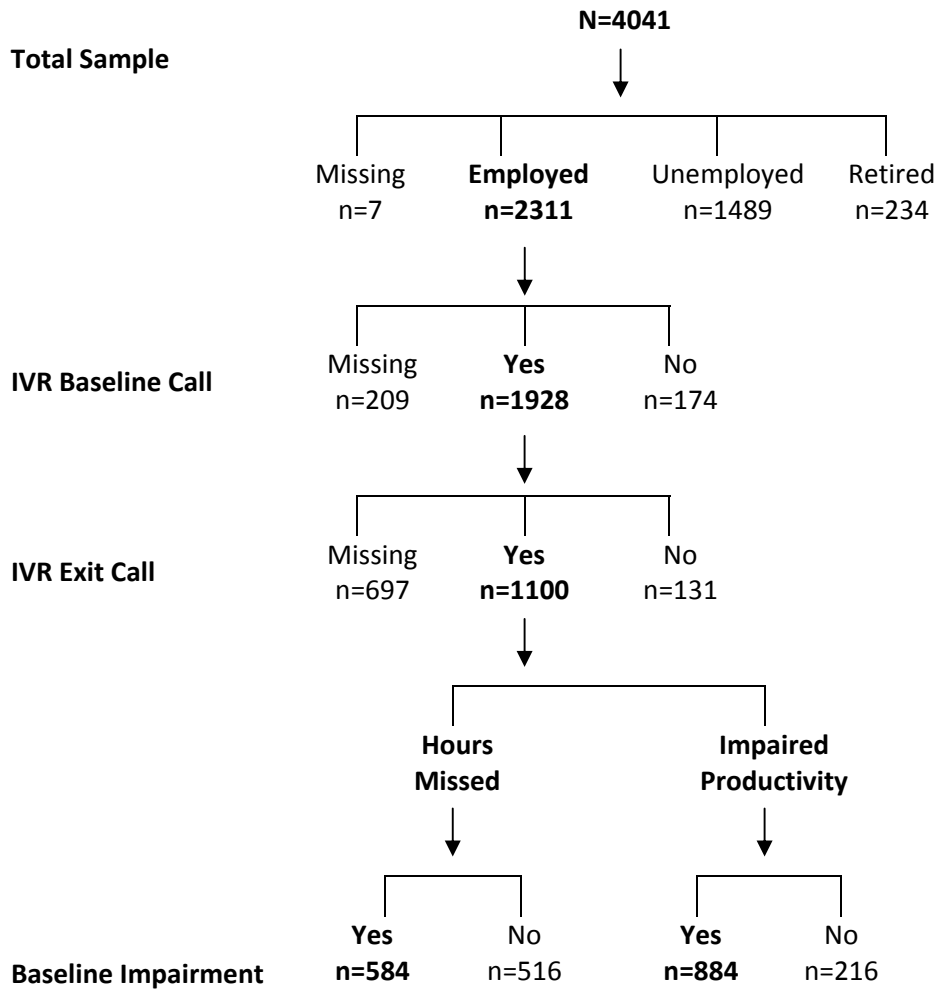

**TABLE S1. Baseline Characteristics of Exit Sample**

| Characteristics               | Exit Sample<br>N=1100        |      |                          |      |                                   |      |
|-------------------------------|------------------------------|------|--------------------------|------|-----------------------------------|------|
|                               | Baseline<br>Sample<br>N=1928 |      | Missed<br>Hours<br>N=584 |      | Impaired<br>Productivity<br>N=884 |      |
|                               | N                            | %    | N                        | %    | N                                 | %    |
| Race                          |                              |      |                          |      |                                   |      |
| White                         | 1538                         | 79.8 | 466                      | 79.8 | 735                               | 83.1 |
| African-American              | 274                          | 14.2 | 82                       | 14.0 | 97                                | 11.0 |
| Others                        | 116                          | 6.0  | 36                       | 6.2  | 52                                | 5.9  |
| Hispanic ethnicity            | 213                          | 11.1 | 61                       | 10.5 | 80                                | 9.1  |
| Gender – Female               | 1223                         | 63.4 | 373                      | 63.9 | 535                               | 60.5 |
| Marital Status                |                              |      |                          |      |                                   |      |
| Never Married                 | 607                          | 31.5 | 152                      | 26.0 | 249                               | 28.2 |
| Married                       | 822                          | 42.6 | 272                      | 46.6 | 407                               | 46.0 |
| Divorced                      | 463                          | 24.0 | 148                      | 25.3 | 213                               | 24.1 |
| Widowed                       | 36                           | 1.9  | 12                       | 2.1  | 15                                | 1.7  |
| Education                     |                              |      |                          |      |                                   |      |
| < High School                 | 118                          | 6.1  | 28                       | 4.8  | 36                                | 4.1  |
| High School - < College       | 1167                         | 60.5 | 339                      | 58.0 | 498                               | 56.3 |
| ≥ College                     | 643                          | 33.4 | 217                      | 37.2 | 350                               | 39.6 |
| Insurance Status              |                              |      |                          |      |                                   |      |
| Private Insurance             | 1286                         | 68.2 | 415                      | 72.3 | 620                               | 71.8 |
| Public Insurance              | 102                          | 5.4  | 28                       | 4.9  | 35                                | 4.1  |
| No Insurance                  | 499                          | 26.4 | 131                      | 22.8 | 208                               | 24.1 |
| Age group                     |                              |      |                          |      |                                   |      |
| 8-25                          | 312                          | 16.2 | 64                       | 11.0 | 120                               | 13.6 |
| 6-35                          | 564                          | 29.3 | 160                      | 27.4 | 235                               | 26.6 |
| 6-50                          | 721                          | 37.4 | 239                      | 40.9 | 351                               | 39.7 |
| 1-65                          | 296                          | 15.3 | 107                      | 18.3 | 162                               | 18.3 |
| 6-75                          | 34                           | 1.8  | 14                       | 2.4  | 16                                | 1.8  |
| Setting – Primary Care        | 712                          | 37.1 | 197                      | 33.7 | 299                               | 33.8 |
| Onset age <18 years           | 762                          | 40.0 | 208                      | 35.8 | 347                               | 39.6 |
| Family History of Depression  | 1072                         | 56.1 | 319                      | 55.1 | 496                               | 56.6 |
| History of Attempted Suicide  | 310                          | 16.1 | 99                       | 17.0 | 121                               | 13.7 |
| Current MDE ≥24 months        | 409                          | 21.4 | 126                      | 21.7 | 182                               | 20.8 |
| Recurrent Depression          | 1375                         | 76.2 | 433                      | 78.3 | 658                               | 79.5 |
| Anxious Depression            | 705                          | 38.6 | 238                      | 42.5 | 310                               | 36.4 |
| Melancholic Depression        | 334                          | 18.3 | 120                      | 21.4 | 160                               | 18.8 |
| Atypical Depression           | 284                          | 15.5 | 107                      | 19.1 | 144                               | 16.9 |
| Generalized Anxiety Disorder  | 356                          | 18.6 | 100                      | 17.3 | 152                               | 17.3 |
| Obsessive Compulsive Disorder | 199                          | 10.4 | 57                       | 9.8  | 76                                | 8.7  |
| Panic Disorder                | 177                          | 9.3  | 52                       | 8.9  | 65                                | 7.4  |
| Social Phobia                 | 546                          | 28.6 | 167                      | 28.8 | 246                               | 28.0 |
| PTSD                          | 270                          | 14.1 | 89                       | 15.3 | 116                               | 13.2 |
| Agoraphobia                   | 145                          | 7.6  | 39                       | 6.7  | 57                                | 6.5  |
| Alcohol abuse/dependence      | 205                          | 10.7 | 51                       | 8.8  | 78                                | 8.9  |
| Drug abuse/dependence         | 109                          | 5.7  | 17                       | 2.9  | 33                                | 3.8  |
| Somatoform Disorder           | 23                           | 1.2  | 6                        | 1.0  | 7                                 | 0.8  |
| Hypochondriasis               | 56                           | 2.9  | 15                       | 2.6  | 18                                | 2.1  |
| Bulimia                       | 245                          | 12.8 | 77                       | 13.3 | 118                               | 13.4 |

TABLE S1 Continued

| Characteristics                  | Exit Sample<br>N=1100        |                |                          |             |                                   |             |
|----------------------------------|------------------------------|----------------|--------------------------|-------------|-----------------------------------|-------------|
|                                  | Baseline<br>Sample<br>N=1928 |                | Missed<br>Hours<br>N=584 |             | Impaired<br>Productivity<br>N=884 |             |
|                                  | N                            | %              | N                        | %           | N                                 | %           |
| Psychiatric Disorder Count       |                              |                |                          |             |                                   |             |
| 0                                | 784                          | 41.4           | 242                      | 42.2        | 385                               | 44.2        |
| 1                                | 524                          | 27.6           | 156                      | 27.2        | 234                               | 26.9        |
| 2                                | 289                          | 15.3           | 99                       | 17.2        | 140                               | 16.1        |
| 3                                | 133                          | 7.0            | 33                       | 5.8         | 55                                | 6.3         |
| ≥4                               | 165                          | 8.7            | 44                       | 7.6         | 57                                | 6.5         |
| General Medical Conditions count |                              |                |                          |             |                                   |             |
| 0                                | 288                          | 14.9           | 77                       | 13.2        | 114                               | 12.9        |
| 1                                | 390                          | 20.2           | 101                      | 17.3        | 181                               | 20.5        |
| 2                                | 370                          | 19.2           | 109                      | 18.7        | 166                               | 18.8        |
| 3                                | 272                          | 14.1           | 86                       | 14.7        | 130                               | 14.7        |
| 4                                | 608                          | 31.6           | 211                      | 36.1        | 293                               | 33.1        |
|                                  | N                            | Mean<br>(SD)   | N                        | Mean (SD)   | N                                 | Mean (SD)   |
| Age (years)                      | 1927                         | 38.3 (11.9)    | 584                      | 40.2 (11.6) | 884                               | 39.6 (11.8) |
| Education (years)                | 1925                         | 14.2 (3)       | 584                      | 14.5 (3)    | 884                               | 14.6 (3)    |
| Monthly Income                   | 1787                         | 3238<br>(3631) | 553                      | 3411 (3309) | 843                               | 3500 (3755) |
| Age at Onset (years)             | 1907                         | 23.6 (12.7)    | 581                      | 24.7 (13.1) | 876                               | 23.9 (13.1) |
| Number of MDEs                   | 1675                         | 5.6 (9.8)      | 514                      | 5.8 (10.1)  | 760                               | 6.3 (11.5)  |
| Length of Current MDE (months)   | 1912                         | 20.4 (43.8)    | 581                      | 19.2 (38.6) | 874                               | 18.6 (38.7) |
| Length of Illness (years)        | 1906                         | 14.7 (12.5)    | 581                      | 15.6 (12.4) | 876                               | 15.7 (12.7) |
| General Medical Conditions       |                              |                |                          |             |                                   |             |
| Categories endorsed              | 1928                         | 2.5(2.1)       | 584                      | 2.8(2.1)    | 884                               | 2.6(2.1)    |
| Total Score                      | 1928                         | 3.4(3.1)       | 584                      | 3.7(3.2)    | 884                               | 3.5(3.1)    |
| Severity Index                   | 1928                         | 1.1(0.6)       | 584                      | 1.1(0.6)    | 884                               | 1.1(0.6)    |
| <b>Symptom Severity</b>          |                              |                |                          |             |                                   |             |
| HRSD <sub>17</sub> (ROA)         | 1819                         | 19.1 (6.3)     | 555                      | 20.2 (6.1)  | 845                               | 19.2 (6.2)  |
| IDS-C <sub>30</sub> (ROA)        | 1814                         | 34.2 (10.9)    | 558                      | 36.2 (10.5) | 844                               | 34.5 (10.4) |
| QIDS-SR <sub>16</sub>            | 1922                         | 15 (4.1)       | 581                      | 15.4 (4)    | 882                               | 14.9 (4)    |
| <b>Function and QOL</b>          |                              |                |                          |             |                                   |             |
| SF-12 Physical                   | 1928                         | 52.7 (10.1)    | 584                      | 52 (10.2)   | 884                               | 52.9 (10.1) |
| SF-12 Mental                     | 1928                         | 25.9 (8.4)     | 584                      | 24.7 (7.6)  | 884                               | 25.2 (7.6)  |
| Q-LES-Q                          | 1928                         | 44.3 (14.1)    | 584                      | 42.2 (12.8) | 884                               | 44 (12.6)   |
| WSAS                             | 1928                         | 22.1 (8.7)     | 584                      | 23.9 (8)    | 884                               | 22.6 (7.8)  |
| Hours Impaired                   | 1928                         | 7.0 (11.4)     | 584                      | 11.3 (12)   | ---                               | ---         |
| Impaired Productivity            | 1928                         | 3.8 (2.8)      | ---                      | ---         | 884                               | 4.7 (2.2)   |

Baseline N=1928, Exit N=1100. Abbreviations: HRSD<sub>17</sub>, 17-item Hamilton rating scale for depression; IDS-C<sub>30</sub>, 30-item inventory of depressive symptomatology – clinician-rated, MDE, Major depressive episode, PTSD, Post-traumatic stress disorder; QIDS-SR<sub>16</sub>, 16-item quick inventory of depressive symptomatology – self-report; Q-LES-Q, Quality of life enjoyment and satisfaction questionnaire; ROA, research outcomes assessor; SF-12 Physical, Physical subscale of the 12-item short-form health survey; SF-12 Mental, Mental subscale of the 12-item short-form health survey; WSAS: Work and social adjustment scale.
